# Supplementary material for: Tetragonal VNb9O24.9-based nanorods: a novel form of lithium battery anode with superior cyclability
Source: Royal Society of Chemistry journal article supplement (doi:10.1039/c3ta12471a), 2013-01-01
Supplement: c3ta12471a.pdf [file c3ta12471a.pdf]

## Supporting Information

### **Tetragonal $VNb_9O_{24.9}$ -based Nanorods: A Novel Form of Lithium Battery Anode with Superior Cyclability**

Ge Li,<sup>a,b</sup> Xiaolei Wang<sup>\*b</sup>, and Xueming Ma<sup>\*a</sup>

[a] G. Li, Prof. X. Ma  
State Key Laboratory of Precision Spectroscopy, and Department of Physics,  
East China Normal University  
Shanghai, 200241, China  
E-mail: [xmma@phy.ecnu.edu.cn](mailto:xmma@phy.ecnu.edu.cn)

[b] G. Li, X. Wang  
Department of Chemical and Biomolecular Engineering,  
University of California, Los Angeles  
Los Angeles, CA 90095, USA  
E-mail: [xlwang0813@ucla.edu](mailto:xlwang0813@ucla.edu)

### **Experimental**

*Synthesis of  $VNb_9O_{24.9}$  nanorods:*  $VNb_9O_{24.9}$  nanorods were synthesized through an aerosol-assisted method. Briefly, ammonium niobate (V) oxalate hydrate ( 4.895 mmol, 1.483 g ), ammonium metavanadate ( 0.786 mmol, 0.092 g ) were dissolved in DI-water ( 100 mL ) followed by an addition of HCl solution ( 2.0 M, 0.5 mL ) under ultrasonication for 1 hour to form a light green and transparent solution. Then Pluronic F-127 ( 1.5 g ) was added and the mixture was stirred for 24 hours at room temperature to form a light blue and transparent solution. The solution underwent an aerosol process at 450 °C in an aerosol synthesis instrument reported somewhere else.<sup>23</sup> The product was collected and then annealed at 550 °C in air for 5 hours with a ramp rate of 5 °C min<sup>-1</sup>. The claybank powders were collected for structure characterizations and electrochemical measurements.

X-ray diffraction (XRD) experiments were conducted on a X'Pert Pro X-ray diffractometer (Panalytical B.V.); scanning electron microscopic (SEM) experiments were conducted on a JEOL JSM-6700 FE-SEM (JEOL); transmission electron microscopic (TEM) experiments were conducted on a Philips CM120 operated at 120 kV (Philips/FEI).

*Electrode Fabrication and Electrochemical Measurements:* The  $VNb_9O_{24.9}$  nanorods was assembled onto nickel foil current collector. Briefly, 80% of the electrochemically active material, 10% carbon black, and 10% *poly(vinylidene fluoride)* (PVDF) were dispersed in *N-methylpyrrolidinone* (NMP) to form slurries. The homogenous slurries were coated on a nickel foil substrate and dried at 100°C for 12 h under vacuum. To make 2032 type coin cells, glass fiber (GF/D) from Whatman was used as the separator; lithium was used as the counter electrodes; 1 M  $LiClO_4$  in propylene carbonate (PC) was used as the electrolyte. The cells were assembled in a glovebox under an argon atmosphere. Electrochemical measurements were carried out on a VMP3 potentiostat/galvanostat (Bio-Logic LLC, Knoxville, TN). Cyclic voltammetric (CV) measurements were carried out using cutoff voltages of 3.000 and 1.000 V versus  $Li^+/Li$ . The charge and discharge measurements were carried out on a LAND CT2000 (Wuhan Jinnuo Electronics, Ltd., Wuhan, China) at different current densities.

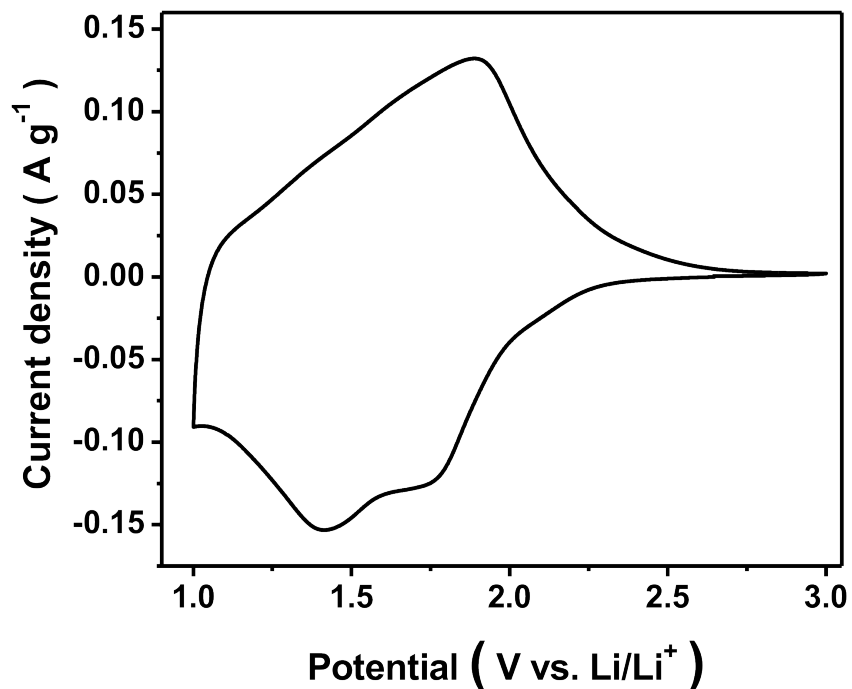

**Figure S1.** 1<sup>st</sup> CV curve of the electrode based on pure Nb<sub>2</sub>O<sub>5</sub> at a scan rate of 0.5 mV s<sup>-1</sup> with a cutting-off voltage from 3.0 to 1.0 V.

**Table 1.** Atomic Parameters for VNb<sub>9</sub>O<sub>25</sub>

| Atom  | <i>x</i>  | <i>y</i>  | <i>z</i>    |
|-------|-----------|-----------|-------------|
| Nb(1) | 0.0000(0) | 0.0000(0) | 0.0000( 0)  |
| Nb(2) | 0.2189(1) | 0.1052(1) | -0.0022(10) |
| Nb(3) | 0.6749(1) | 0.1179(1) | 0.0001(10)  |
| V     | 0.0000(0) | 0.5000(0) | 0.2500( 0)  |
| O(1)  | 0.4868(5) | 0.2189(4) | 0.5085(81)  |
| O(2)  | 0.9503(5) | 0.1160(5) | -0.0112(77) |
| O(3)  | 0.3532(5) | 0.1577(4) | -0.0042(82) |
| O(4)  | 0.1763(5) | 0.2170(4) | -0.0085(82) |
| O(5)  | 0.2512(5) | 0.1108(4) | 0.4872(62)  |
| O(6)  | 0.0000(0) | 0.0000(0) | 0.5000( 0)  |
| O(7)  | 0.0743(4) | 0.4470(4) | 0.0231(47)  |
